# Supplementary material for: Design and Study of a Photo-Switchable Polymeric System in the Presence of ZnS Nanoparticles under the Influence of UV Light Irradiation
Source: MDPI journal article supplement (doi:10.3390/polym14050945), 2022-02-26
Supplement: s1 [file s1]

Supplementary Material

# Design and Study of a Photo-Switchable Polymeric System in the Presence of ZnS Nanoparticles under the Influence of UV Light Irradiation

Guadalupe del C. Pizarro <sup>1,\*</sup>, Wilson Alavia <sup>1,2</sup>, Karen González <sup>1</sup>, Héctor Díaz <sup>1</sup>, Oscar G. Marambio <sup>1</sup>, Rudy Martin-Trasanco <sup>1</sup>, Julio Sánchez <sup>3</sup>, Diego P. Oyarzún <sup>4</sup> and Andónico Neira-Carrillo <sup>5</sup>

<sup>1</sup> Departamento de Química, Facultad de Ciencias Naturales, Matemáticas y Medio Ambiente, Universidad Tecnológica Metropolitana, Santiago 7800003, Chile; w.alaviam@outlook.com (W.A.); karen.005@hotmail.es (K.G.); hdiaz@utem.cl (H.D.); omarambi@gmail.com (O.G.M.); rudy.martint@utem.cl (R.M.-T.)

<sup>2</sup> Programa Institucional de Fomento a la Investigación, Desarrollo e Innovación (PIDi), Universidad Tecnológica Metropolitana, Santiago 7800003, Chile

<sup>3</sup> Departamento de Ciencias del Ambiente, Facultad de Química y Biología, Universidad de Santiago de Chile, USACH, Santiago 9170022, Chile; julio.sanchez@usach.cl

<sup>4</sup> Laboratorio de Nanotecnología, Recursos Naturales y Sistemas Complejos, Facultad de Ciencias Naturales, Universidad de Atacama, Copiapó 1530000, Chile; diequim@gmail.com

<sup>5</sup> Departamento de Ciencias Biológicas, Facultad de Ciencias Veterinarias y Pecuarias, Universidad de Chile, Santiago 7800003, Chile; aneira@uchile.cl

\* Correspondence: gpizarro@utem.cl or pizarroguadalupe048@gmail.com; Tel.: +56-2-27877132

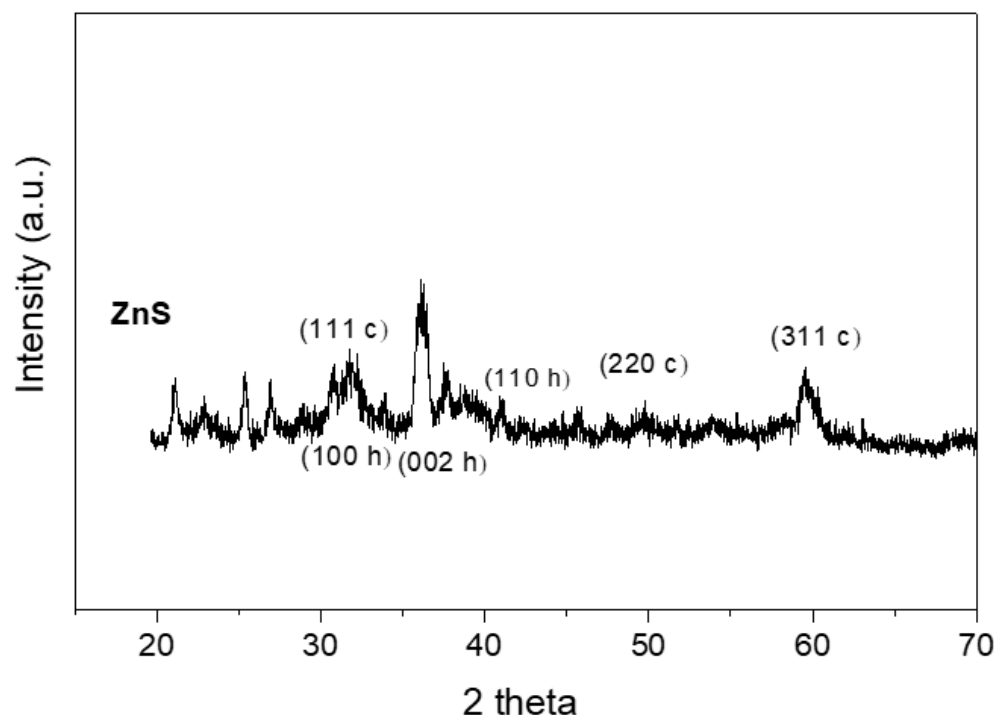

**Figure S1.** X-ray diffraction pattern of ZnS (blende and hexagonal structures).

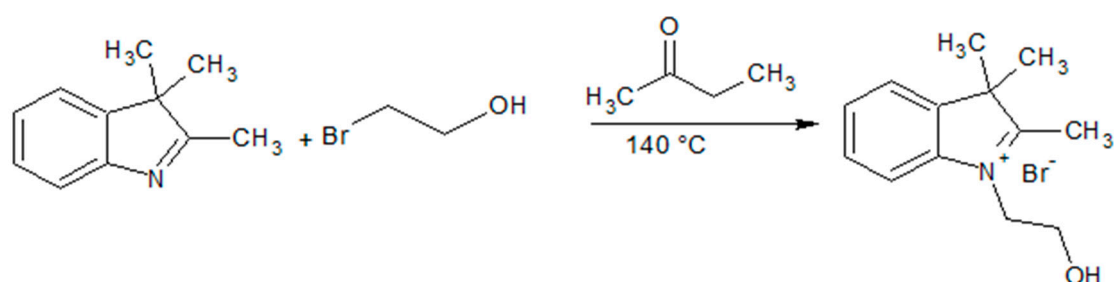

**Figure S2.** Synthesis reaction of 1-(2-hydroxyethyl)-2,3,3-trimethylindolenine bromide.

Figure S3 a) shows the following chemical shifts at ( $\delta$ , ppm,  $\text{CDCl}_3$ ): 7.57 (4H, multiplet, aromatic ring); 4.89 (2H, triplet,  $\text{CH}_2\text{-N}$ ); 4.20 (2H, triplet,  $\text{CH}_2\text{-OH}$ ); 3.15 (1H, singlet,  $-\text{OH}$ ); 1.65 (9H, singlet,  $-\text{CH}_3$ ). The signals and displacements shown in the  $^1\text{H-NMR}$  spectrum confirm the molecular structure of 1-(2-hydroxyethyl)-2,3,3-trimethylindolenine bromide.

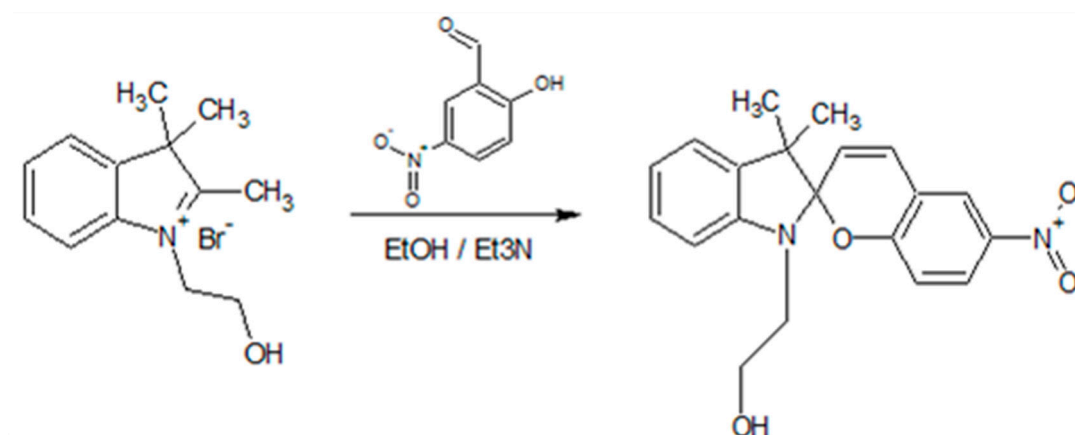

**Figure S3.** Synthesis of 1-(2-hydroxyethyl)-3,3-dimethylindoline-6-nitrobenzopyran.

$^1\text{H-NMR}$  ( $\delta$ , ppm,  $\text{CDCl}_3$ ) spectrum for the 1-(2-hydroxyethyl)-3,3-dimethylindoline-6-nitrobenzopyran exhibits clearly characteristic resonance signals, which confirmed the structure of the compound (see Figure S4), at: 7.97-7.92 [2H, multiplet, H (a) and H (b)]; 7.18 [1H, triplet, H (c)]; 7.01 [1H, doublet, H (d)]; 6.84 [2H, triplet, H (e) & H (f)]; 6.71 [1H, doublet, H (g)]; 6.57 [1H, doublet, H (h)]; 5.84 [1H, doublet, H (i)]; 3.71 [2H, triplet,  $\text{CH}_2\text{-OH}$ ]; 3.46 [2H, multiplet,  $\text{CH}_2\text{-N}$ ]; 1.53 [1H, singlet,  $-\text{OH}$ ]; 1.22 [3H, singlet,  $-\text{CH}_3$ ]; 1.12 [3H, singlet,  $-\text{CH}_3$ ]. The FT-IR spectra ( $\text{cm}^{-1}$ , KBr) shows the following vibrational bands at 3365  $\text{cm}^{-1}$  (O-H stretch;  $-\text{CH}_2\text{OH}$ ); 3068  $\text{cm}^{-1}$  (stretching  $=\text{C-H}$ ); 2961  $\text{cm}^{-1}$  (stretching  $\text{CH-}$ ,  $-\text{CH}_2$ ,  $-\text{CH}_3$ ); 1930-1836  $\text{cm}^{-1}$  (Ar-H aromatic overtones); 1603  $\text{cm}^{-1}$  (stretching  $-\text{C}=\text{C}-$ ); 1510  $\text{cm}^{-1}$  (asymmetric stretching  $\text{Ar-NO}_2$ ); 1335  $\text{cm}^{-1}$  (symmetric stretch  $\text{Ar-NO}_2$ ); 1088  $\text{cm}^{-1}$  (flexion  $-\text{C-O-C-}$ ). The signals are characteristic of the photochromic compound 1-(2-hydroxyethyl)-3,3-dimethylindoline-6-nitrobenzopyran, (see Figure S4).

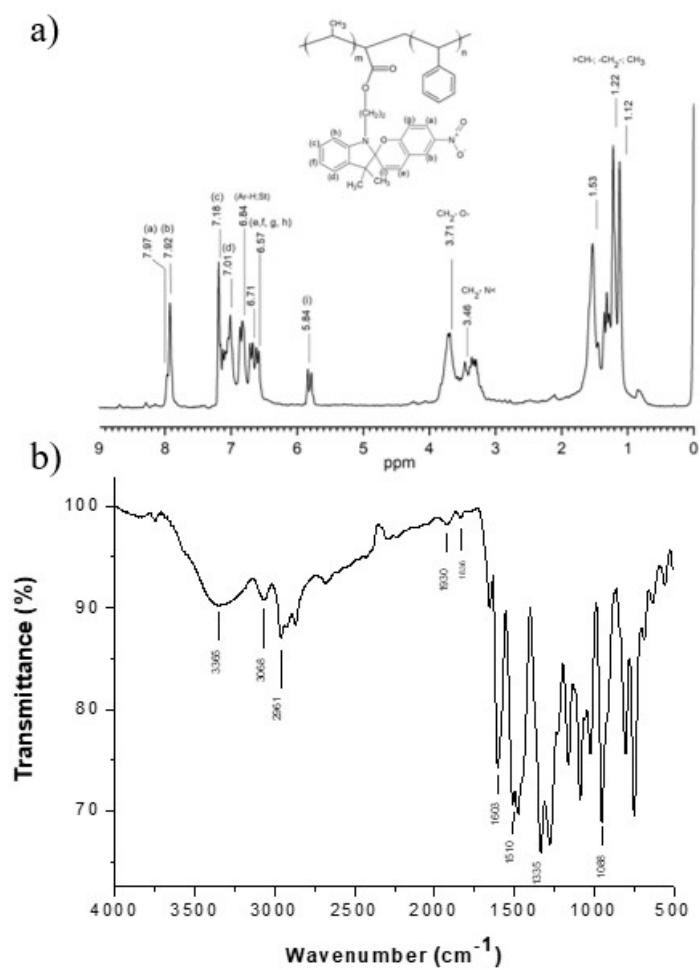

**Figure S4.** (a) <sup>1</sup>H-NMR spectrum of 1-(2-hydroxyethyl)-3,3-dimethylindoline-6-nitrobenzopyran (b) FT-IR of 1-(2-hydroxyethyl)-3,3-dimethylindoline-6-nitrobenzopyran.

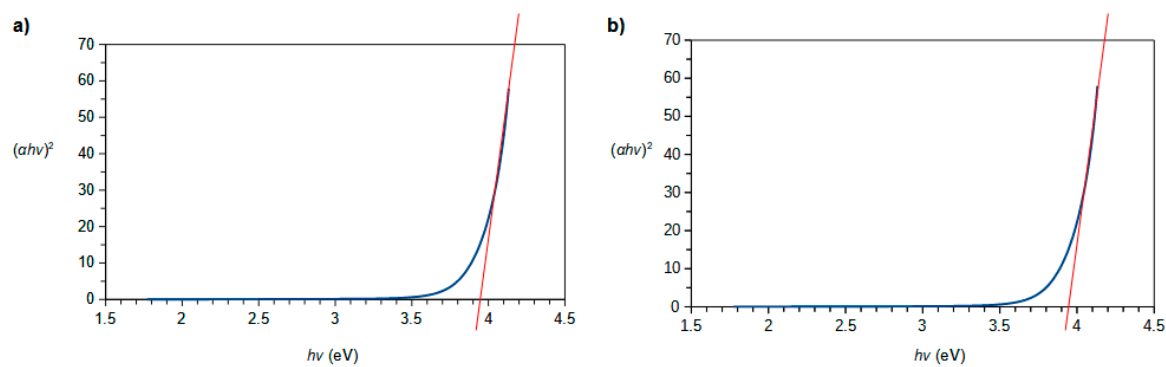

**Figure S5.** Band gap of ZnS (a) before and (b) after ultraviolet irradiation (365 nm, 0.4 mW/cm<sup>2</sup>).

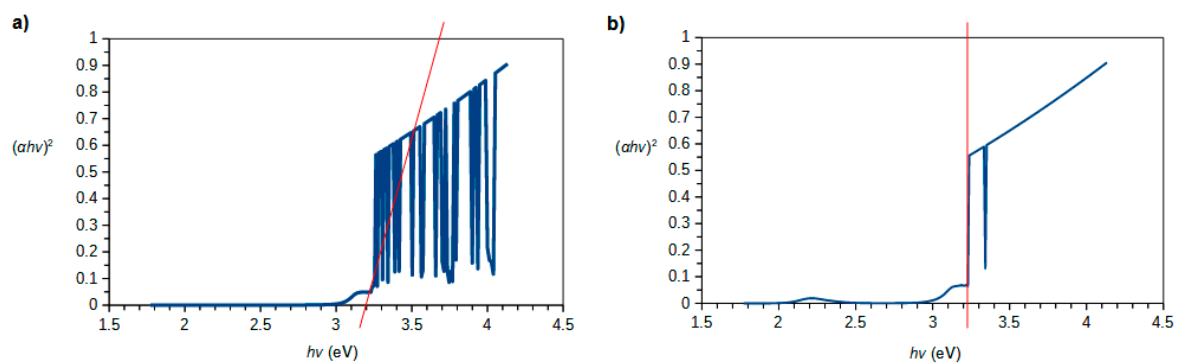

**Figure S6.** Band gap of 1-(2-hydroxyethyl)-3,3-dimethylindoline-6-nitrobenzopyran (*SP*) (a) before and (b) after ultraviolet irradiation (365 nm, 0.4 mW/cm<sup>2</sup>).

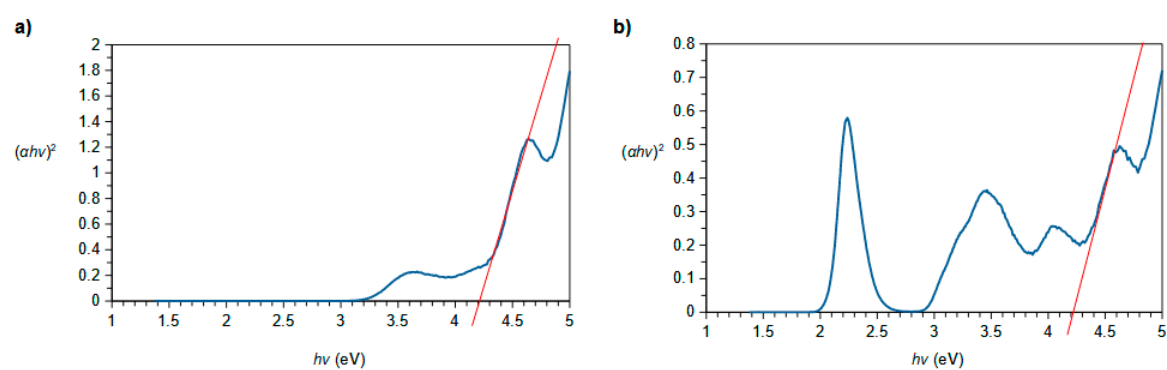

**Figure S7.** Band gap of PS-*b*-PMMA-*SP* (a) before and (b) after ultraviolet irradiation (365 nm, 0.4 mW/cm<sup>2</sup> for 10 min).

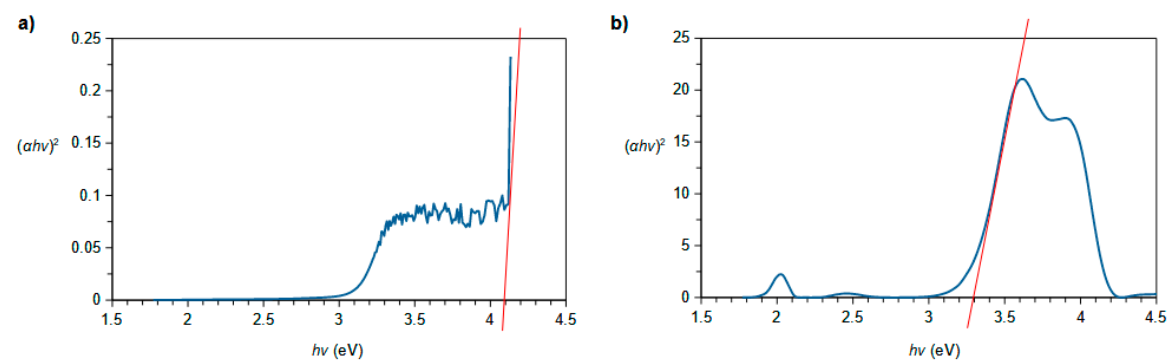

**Figure S8.** Band gap of PS-*b*-PMMA-*SP*-ZnS (NPs) (a) before and (b) after ultraviolet irradiation (365 nm, 0.4 mW/cm<sup>2</sup> for 10 min).
